# Supplementary material for: Effect of downregulated citrate synthase on oxidative phosphorylation signaling pathway in HEI-OC1 cells
Source: Proteome Sci. 2022 Sep 7;20:14. doi: 10.1186/s12953-022-00196-0 (PMC9450364; doi:10.1186/s12953-022-00196-0)
Supplement: Supplementary file 7 — Additional file 7: Supplementary Table 5. [file 12953_2022_196_MOESM7_ESM.xlsx]

## Sheet: Kegg
Pathway Name	Pathway ID	Pvalue	Pvalue_adjusted	Genes	Count	Pop Hit	List_Total	Background Genes	URL	Class
Oxidative phosphorylation	mmu00190	1.07e-06	0.000162	Ndufs3|0.881260287;Tcirg1|0.881232361;Ndufb5|0.895073425;Ndufa13|0.900926586;Cox4i1|0.890122873;Ndufa2|0.871986894;Ndufb8|0.795913785;Uqcrb|0.856778087;Ndufs7|0.904761905;Ndufb3|0.81799591	10	139	79	7883	http://www.kegg.jp/kegg-bin/show_pathway?mmu00190/mmu:68349%09blue/mmu:27060%09blue/mmu:66046%09blue/mmu:67184%09blue/mmu:12857%09blue/mmu:17991%09blue/mmu:67264%09blue/mmu:67530%09blue/mmu:75406%09blue/mmu:66495%09blue	Metabolism
Parkinson's disease	mmu05012	2.03e-06	0.000162	Ndufs3|0.881260287;Prkacb|1.412545235;Ndufb5|0.895073425;Ndufa13|0.900926586;Cox4i1|0.890122873;Ndufa2|0.871986894;Ndufb8|0.795913785;Uqcrb|0.856778087;Ndufs7|0.904761905;Ndufb3|0.81799591	10	149	79	7883	http://www.kegg.jp/kegg-bin/show_pathway?mmu05012/mmu:68349%09blue/mmu:18749%09red/mmu:66046%09blue/mmu:67184%09blue/mmu:12857%09blue/mmu:17991%09blue/mmu:67264%09blue/mmu:67530%09blue/mmu:75406%09blue/mmu:66495%09blue	Human Diseases
Alzheimer's disease	mmu05010	9.53e-06	0.000508	Ndufs3|0.881260287;Ndufb5|0.895073425;Ndufa13|0.900926586;Cox4i1|0.890122873;Cdk5|1.113606341;Ndufa2|0.871986894;Ndufb8|0.795913785;Uqcrb|0.856778087;Ndufs7|0.904761905;Ndufb3|0.81799591	10	177	79	7883	http://www.kegg.jp/kegg-bin/show_pathway?mmu05010/mmu:68349%09blue/mmu:66046%09blue/mmu:67184%09blue/mmu:12857%09blue/mmu:12568%09red/mmu:17991%09blue/mmu:67264%09blue/mmu:67530%09blue/mmu:75406%09blue/mmu:66495%09blue	Human Diseases
Non-alcoholic fatty liver disease (NAFLD)	mmu04932	2.45e-05	0.000981	Ndufs3|0.881260287;Ndufb5|0.895073425;Ndufa13|0.900926586;Cox4i1|0.890122873;Ndufa2|0.871986894;Ndufb8|0.795913785;Uqcrb|0.856778087;Ndufs7|0.904761905;Ndufb3|0.81799591	9	157	79	7883	http://www.kegg.jp/kegg-bin/show_pathway?mmu04932/mmu:68349%09blue/mmu:66046%09blue/mmu:67184%09blue/mmu:12857%09blue/mmu:17991%09blue/mmu:67264%09blue/mmu:67530%09blue/mmu:75406%09blue/mmu:66495%09blue	Human Diseases
Huntington's disease	mmu05016	0.000155	0.00496	Ndufs3|0.881260287;Ndufb5|0.895073425;Ndufa13|0.900926586;Cox4i1|0.890122873;Ndufa2|0.871986894;Ndufb8|0.795913785;Uqcrb|0.856778087;Ndufs7|0.904761905;Ndufb3|0.81799591	9	199	79	7883	http://www.kegg.jp/kegg-bin/show_pathway?mmu05016/mmu:68349%09blue/mmu:66046%09blue/mmu:67184%09blue/mmu:12857%09blue/mmu:17991%09blue/mmu:67264%09blue/mmu:67530%09blue/mmu:75406%09blue/mmu:66495%09blue	Human Diseases
Hedgehog signaling pathway	mmu04340	0.000936	0.025	Cul1|1.101654846;Prkacb|1.412545235;Sufu|1.100840336;Kif3a|1.110261145	4	44	79	7883	http://www.kegg.jp/kegg-bin/show_pathway?mmu04340/mmu:26965%09red/mmu:18749%09red/mmu:24069%09red/mmu:16568%09red	Environmental Information Processing
Sulfur relay system	mmu04122	0.00424	0.0968	Urm1|1.148536127;Nfs1|1.384798808	2	10	79	7883	http://www.kegg.jp/kegg-bin/show_pathway?mmu04122/mmu:68205%09red/mmu:18041%09red	Genetic Information Processing
Sulfur metabolism	mmu00920	0.00514	0.103	Impad1|0.853370396;Suox|1.333722287	2	11	79	7883	http://www.kegg.jp/kegg-bin/show_pathway?mmu00920/mmu:242291%09blue/mmu:211389%09red	Metabolism
Oocyte meiosis	mmu04114	0.006	0.107	Cul1|1.101654846;Prkacb|1.412545235;Mad2l1|1.15544181;Cdc23|0.888338055;Ppp2r5c|1.114164905	5	116	79	7883	http://www.kegg.jp/kegg-bin/show_pathway?mmu04114/mmu:26965%09red/mmu:18749%09red/mmu:56150%09red/mmu:52563%09blue/mmu:26931%09red	Cellular Processes
Metabolic pathways	mmu01100	0.00706	0.113	Ugdh|0.855717931;Tk1|1.114723764;Cs|0.504985889;Impad1|0.853370396;Hmgcs1|0.88791883;Idh1|0.899097816;Ndufs3|0.881260287;Enoph1|1.209000552;Tcirg1|0.881232361;Ndufb5|0.895073425;Ndufa13|0.900926586;Cox4i1|0.890122873;Ndufa2|0.871986894;Pon2|0.85162037;Fpgs|0.874443664;Ndufb8|0.795913785;Uqcrb|0.856778087;Aldh5a1|1.15285253;Ndufs7|0.904761905;Ndufb3|0.81799591;Nfs1|1.384798808;Dgat1|0.808318264	22	1295	79	7883	http://www.kegg.jp/kegg-bin/show_pathway?mmu01100/mmu:22235%09blue/mmu:21877%09red/mmu:12974%09blue/mmu:242291%09blue/mmu:208715%09blue/mmu:15926%09blue/mmu:68349%09blue/mmu:67870%09red/mmu:27060%09blue/mmu:66046%09blue/mmu:67184%09blue/mmu:12857%09blue/mmu:17991%09blue/mmu:330260%09blue/mmu:14287%09blue/mmu:67264%09blue/mmu:67530%09blue/mmu:214579%09red/mmu:75406%09blue/mmu:66495%09blue/mmu:1804…	Metabolism
Cell cycle	mmu04110	0.00819	0.119	Cul1|1.101654846;Mad1l1|1.112490098;Mad2l1|1.15544181;Cdc23|0.888338055;Bub1b|0.901140684	5	125	79	7883	http://www.kegg.jp/kegg-bin/show_pathway?mmu04110/mmu:26965%09red/mmu:17120%09red/mmu:56150%09red/mmu:52563%09blue/mmu:12236%09blue	Cellular Processes
Complement and coagulation cascades	mmu04610	0.0111	0.148	Serpine1|0.895946907;Serpinb2|0.908180301;Serpinc1|0.867849638;Fgb|1.186663023	4	87	79	7883	http://www.kegg.jp/kegg-bin/show_pathway?mmu04610/mmu:18787%09blue/mmu:18788%09blue/mmu:11905%09blue/mmu:110135%09red	Organismal Systems
Progesterone-mediated oocyte maturation	mmu04914	0.0125	0.153	Mad1l1|1.112490098;Prkacb|1.412545235;Mad2l1|1.15544181;Cdc23|0.888338055	4	90	79	7883	http://www.kegg.jp/kegg-bin/show_pathway?mmu04914/mmu:17120%09red/mmu:18749%09red/mmu:56150%09red/mmu:52563%09blue	Organismal Systems
2-Oxocarboxylic acid metabolism	mmu01210	0.0168	0.192	Cs|0.504985889;Idh1|0.899097816	2	20	79	7883	http://www.kegg.jp/kegg-bin/show_pathway?mmu01210/mmu:12974%09blue/mmu:15926%09blue	Metabolism
Glutathione metabolism	mmu00480	0.0192	0.196	Gsr|1.163061114;Idh1|0.899097816;Gstm1|1.108592514	3	57	79	7883	http://www.kegg.jp/kegg-bin/show_pathway?mmu00480/mmu:14782%09red/mmu:15926%09blue/mmu:14862%09red	Metabolism
AGE-RAGE signaling pathway in diabetic complications	mmu04933	0.0196	0.196	Col1a1|0.870673527;Serpine1|0.895946907;Ccl2|0.873331772;Col4a2|1.110524927	4	103	79	7883	http://www.kegg.jp/kegg-bin/show_pathway?mmu04933/mmu:12842%09blue/mmu:18787%09blue/mmu:20296%09blue/mmu:12827%09red	-
Amoebiasis	mmu05146	0.025	0.235	Col1a1|0.870673527;Serpinb1a|0.90023753;Prkacb|1.412545235;Col4a2|1.110524927	4	111	79	7883	http://www.kegg.jp/kegg-bin/show_pathway?mmu05146/mmu:12842%09blue/mmu:66222%09blue/mmu:18749%09red/mmu:12827%09red	Human Diseases
Hippo signaling pathway -multiple species	mmu04392	0.0276	0.245	Rassf1|1.160994057;Lats1|0.874853527	2	26	79	7883	http://www.kegg.jp/kegg-bin/show_pathway?mmu04392/mmu:56289%09red/mmu:16798%09blue	-
Butanoate metabolism	mmu00650	0.0296	0.249	Hmgcs1|0.88791883;Aldh5a1|1.15285253	2	27	79	7883	http://www.kegg.jp/kegg-bin/show_pathway?mmu00650/mmu:208715%09blue/mmu:214579%09red	Metabolism
Thiamine metabolism	mmu00730	0.0395	0.309	Nfs1|1.384798808	1	4	79	7883	http://www.kegg.jp/kegg-bin/show_pathway?mmu00730/mmu:18041%09red	Metabolism
Citrate cycle (TCA cycle)	mmu00020	0.0405	0.309	Cs|0.504985889;Idh1|0.899097816	2	32	79	7883	http://www.kegg.jp/kegg-bin/show_pathway?mmu00020/mmu:12974%09blue/mmu:15926%09blue	Metabolism
ECM-receptor interaction	mmu04512	0.0503	0.366	Col1a1|0.870673527;Dag1|0.890359168;Col4a2|1.110524927	3	83	79	7883	http://www.kegg.jp/kegg-bin/show_pathway?mmu04512/mmu:12842%09blue/mmu:13138%09blue/mmu:12827%09red	Environmental Information Processing
Protein digestion and absorption	mmu04974	0.0612	0.426	Col1a1|0.870673527;Col4a2|1.110524927;Try5|0.879257693	3	90	79	7883	http://www.kegg.jp/kegg-bin/show_pathway?mmu04974/mmu:12842%09blue/mmu:12827%09red/mmu:103964%09blue	Organismal Systems
Cocaine addiction	mmu05030	0.0862	0.571	Prkacb|1.412545235;Cdk5|1.113606341	2	49	79	7883	http://www.kegg.jp/kegg-bin/show_pathway?mmu05030/mmu:18749%09red/mmu:12568%09red	Human Diseases
Malaria	mmu05144	0.0893	0.571	Hba-a2|0.795332136;Ccl2|0.873331772	2	50	79	7883	http://www.kegg.jp/kegg-bin/show_pathway?mmu05144/mmu:110257%09blue/mmu:20296%09blue	Human Diseases
Synthesis and degradation of ketone bodies	mmu00072	0.105	0.646	Hmgcs1|0.88791883	1	11	79	7883	http://www.kegg.jp/kegg-bin/show_pathway?mmu00072/mmu:208715%09blue	Metabolism
Platelet activation	mmu04611	0.125	0.743	Col1a1|0.870673527;Prkacb|1.412545235;Fgb|1.186663023	3	123	79	7883	http://www.kegg.jp/kegg-bin/show_pathway?mmu04611/mmu:12842%09blue/mmu:18749%09red/mmu:110135%09red	Organismal Systems
Folate biosynthesis	mmu00790	0.132	0.752	Fpgs|0.874443664	1	14	79	7883	http://www.kegg.jp/kegg-bin/show_pathway?mmu00790/mmu:14287%09blue	Metabolism
Nitrogen metabolism	mmu00910	0.158	0.774	Ca13|1.312138728	1	17	79	7883	http://www.kegg.jp/kegg-bin/show_pathway?mmu00910/mmu:71934%09red	Metabolism
Bile secretion	mmu04976	0.159	0.774	Abcb1b|0.883239171;Prkacb|1.412545235	2	71	79	7883	http://www.kegg.jp/kegg-bin/show_pathway?mmu04976/mmu:18669%09blue/mmu:18749%09red	Organismal Systems
Thyroid hormone synthesis	mmu04918	0.159	0.774	Gsr|1.163061114;Prkacb|1.412545235	2	71	79	7883	http://www.kegg.jp/kegg-bin/show_pathway?mmu04918/mmu:14782%09red/mmu:18749%09red	Organismal Systems
HTLV-I infection	mmu05166	0.173	0.774	Prkacb|1.412545235;Mad2l1|1.15544181;Cdc23|0.888338055;Bub1b|0.901140684;Crtc2|0.899121766	5	295	79	7883	http://www.kegg.jp/kegg-bin/show_pathway?mmu05166/mmu:18749%09red/mmu:56150%09red/mmu:52563%09blue/mmu:12236%09blue/mmu:74343%09blue	Human Diseases
Ubiquitin mediated proteolysis	mmu04120	0.178	0.774	Cul1|1.101654846;Pml|1.109148431;Cdc23|0.888338055	3	145	79	7883	http://www.kegg.jp/kegg-bin/show_pathway?mmu04120/mmu:26965%09red/mmu:18854%09red/mmu:52563%09blue	Genetic Information Processing
Salivary secretion	mmu04970	0.184	0.774	Atp2b4|0.908158397;Prkacb|1.412545235	2	78	79	7883	http://www.kegg.jp/kegg-bin/show_pathway?mmu04970/mmu:381290%09blue/mmu:18749%09red	Organismal Systems
Herpes simplex infection	mmu05168	0.187	0.774	Cul1|1.101654846;Srsf5|1.133635636;Pml|1.109148431;Ccl2|0.873331772	4	224	79	7883	http://www.kegg.jp/kegg-bin/show_pathway?mmu05168/mmu:26965%09red/mmu:20384%09red/mmu:18854%09red/mmu:20296%09blue	Human Diseases
Biosynthesis of amino acids	mmu01230	0.187	0.774	Cs|0.504985889;Idh1|0.899097816	2	79	79	7883	http://www.kegg.jp/kegg-bin/show_pathway?mmu01230/mmu:12974%09blue/mmu:15926%09blue	Metabolism
Systemic lupus erythematosus	mmu05322	0.188	0.774	Hist1h4a|0.904739224;Hist2h2ac|1.10832894;Hist2h2ab|1.185519126	3	149	79	7883	http://www.kegg.jp/kegg-bin/show_pathway?mmu05322/mmu:100041230%09blue/mmu:319176%09red/mmu:621893%09red	Human Diseases
Cardiac muscle contraction	mmu04260	0.191	0.774	Cox4i1|0.890122873;Uqcrb|0.856778087	2	80	79	7883	http://www.kegg.jp/kegg-bin/show_pathway?mmu04260/mmu:12857%09blue/mmu:67530%09blue	Organismal Systems
Adrenergic signaling in cardiomyocytes	mmu04261	0.195	0.774	Atp2b4|0.908158397;Prkacb|1.412545235;Ppp2r5c|1.114164905	3	152	79	7883	http://www.kegg.jp/kegg-bin/show_pathway?mmu04261/mmu:381290%09blue/mmu:18749%09red/mmu:26931%09red	Organismal Systems
Hippo signaling pathway	mmu04390	0.2	0.774	Serpine1|0.895946907;Rassf1|1.160994057;Lats1|0.874853527	3	154	79	7883	http://www.kegg.jp/kegg-bin/show_pathway?mmu04390/mmu:18787%09blue/mmu:56289%09red/mmu:16798%09blue	Environmental Information Processing
Rheumatoid arthritis	mmu05323	0.209	0.774	Tcirg1|0.881232361;Ccl2|0.873331772	2	85	79	7883	http://www.kegg.jp/kegg-bin/show_pathway?mmu05323/mmu:27060%09blue/mmu:20296%09blue	Human Diseases
Terpenoid backbone biosynthesis	mmu00900	0.215	0.774	Hmgcs1|0.88791883	1	24	79	7883	http://www.kegg.jp/kegg-bin/show_pathway?mmu00900/mmu:208715%09blue	Metabolism
Dilated cardiomyopathy	mmu05414	0.228	0.774	Prkacb|1.412545235;Dag1|0.890359168	2	90	79	7883	http://www.kegg.jp/kegg-bin/show_pathway?mmu05414/mmu:18749%09red/mmu:13138%09blue	-
Collecting duct acid secretion	mmu04966	0.238	0.774	Tcirg1|0.881232361	1	27	79	7883	http://www.kegg.jp/kegg-bin/show_pathway?mmu04966/mmu:27060%09blue	Organismal Systems
Ascorbate and aldarate metabolism	mmu00053	0.238	0.774	Ugdh|0.855717931	1	27	79	7883	http://www.kegg.jp/kegg-bin/show_pathway?mmu00053/mmu:22235%09blue	Metabolism
Influenza A	mmu05164	0.248	0.774	Pml|1.109148431;Ccl2|0.873331772;Try5|0.879257693	3	172	79	7883	http://www.kegg.jp/kegg-bin/show_pathway?mmu05164/mmu:18854%09red/mmu:20296%09blue/mmu:103964%09blue	Human Diseases
mRNA surveillance pathway	mmu03015	0.25	0.774	Ppp2r5c|1.114164905;Wdr82|1.122546419	2	96	79	7883	http://www.kegg.jp/kegg-bin/show_pathway?mmu03015/mmu:26931%09red/mmu:77305%09red	Genetic Information Processing
Glyoxylate and dicarboxylate metabolism	mmu00630	0.261	0.774	Cs|0.504985889	1	30	79	7883	http://www.kegg.jp/kegg-bin/show_pathway?mmu00630/mmu:12974%09blue	Metabolism
Pancreatic secretion	mmu04972	0.265	0.774	Atp2b4|0.908158397;Try5|0.879257693	2	100	79	7883	http://www.kegg.jp/kegg-bin/show_pathway?mmu04972/mmu:381290%09blue/mmu:103964%09blue	Organismal Systems
Pentose phosphate pathway	mmu00030	0.269	0.774	Dera|1.458064516	1	31	79	7883	http://www.kegg.jp/kegg-bin/show_pathway?mmu00030/mmu:232449%09red	Metabolism
Circadian rhythm	mmu04710	0.269	0.774	Cul1|1.101654846	1	31	79	7883	http://www.kegg.jp/kegg-bin/show_pathway?mmu04710/mmu:26965%09red	Organismal Systems
Glucagon signaling pathway	mmu04922	0.272	0.774	Prkacb|1.412545235;Crtc2|0.899121766	2	102	79	7883	http://www.kegg.jp/kegg-bin/show_pathway?mmu04922/mmu:18749%09red/mmu:74343%09blue	Organismal Systems
Chagas disease (American trypanosomiasis)	mmu05142	0.28	0.774	Serpine1|0.895946907;Ccl2|0.873331772	2	104	79	7883	http://www.kegg.jp/kegg-bin/show_pathway?mmu05142/mmu:18787%09blue/mmu:20296%09blue	Human Diseases
Prion diseases	mmu05020	0.29	0.774	Prkacb|1.412545235	1	34	79	7883	http://www.kegg.jp/kegg-bin/show_pathway?mmu05020/mmu:18749%09red	Human Diseases
Pentose and glucuronate interconversions	mmu00040	0.305	0.774	Ugdh|0.855717931	1	36	79	7883	http://www.kegg.jp/kegg-bin/show_pathway?mmu00040/mmu:22235%09blue	Metabolism
Renin-angiotensin system	mmu04614	0.305	0.774	Nln|0.901830283	1	36	79	7883	http://www.kegg.jp/kegg-bin/show_pathway?mmu04614/mmu:75805%09blue	Organismal Systems
African trypanosomiasis	mmu05143	0.312	0.774	Hba-a2|0.795332136	1	37	79	7883	http://www.kegg.jp/kegg-bin/show_pathway?mmu05143/mmu:110257%09blue	Human Diseases
Alanine, aspartate and glutamate metabolism	mmu00250	0.319	0.774	Aldh5a1|1.15285253	1	38	79	7883	http://www.kegg.jp/kegg-bin/show_pathway?mmu00250/mmu:214579%09red	Metabolism
Thyroid hormone signaling pathway	mmu04919	0.328	0.774	Prkacb|1.412545235;Med30|1.182537517	2	117	79	7883	http://www.kegg.jp/kegg-bin/show_pathway?mmu04919/mmu:18749%09red/mmu:69790%09red	Organismal Systems
Carbon metabolism	mmu01200	0.332	0.774	Cs|0.504985889;Idh1|0.899097816	2	118	79	7883	http://www.kegg.jp/kegg-bin/show_pathway?mmu01200/mmu:12974%09blue/mmu:15926%09blue	Metabolism
Fat digestion and absorption	mmu04975	0.332	0.774	Dgat1|0.808318264	1	40	79	7883	http://www.kegg.jp/kegg-bin/show_pathway?mmu04975/mmu:13350%09blue	Organismal Systems
Alcoholism	mmu05034	0.336	0.774	Hist1h4a|0.904739224;Hist2h2ac|1.10832894;Hist2h2ab|1.185519126	3	204	79	7883	http://www.kegg.jp/kegg-bin/show_pathway?mmu05034/mmu:100041230%09blue/mmu:319176%09red/mmu:621893%09red	Human Diseases
Bladder cancer	mmu05219	0.339	0.774	Rassf1|1.160994057	1	41	79	7883	http://www.kegg.jp/kegg-bin/show_pathway?mmu05219/mmu:56289%09red	Human Diseases
Endocytosis	mmu04144	0.34	0.774	Pml|1.109148431;Washc4|0.83677686;Asap2|1.166576381;Chmp1b1|0.652892562	4	294	79	7883	http://www.kegg.jp/kegg-bin/show_pathway?mmu04144/mmu:18854%09red/mmu:319277%09blue/mmu:211914%09red/mmu:67064%09blue	Cellular Processes
Vasopressin-regulated water reabsorption	mmu04962	0.352	0.774	Prkacb|1.412545235	1	43	79	7883	http://www.kegg.jp/kegg-bin/show_pathway?mmu04962/mmu:18749%09red	Organismal Systems
Pathways in cancer	mmu05200	0.369	0.774	Pml|1.109148431;Prkacb|1.412545235;Sufu|1.100840336;Rassf1|1.160994057;Col4a2|1.110524927	5	398	79	7883	http://www.kegg.jp/kegg-bin/show_pathway?mmu05200/mmu:18854%09red/mmu:18749%09red/mmu:24069%09red/mmu:56289%09red/mmu:12827%09red	Human Diseases
ABC transporters	mmu02010	0.372	0.774	Abcb1b|0.883239171	1	46	79	7883	http://www.kegg.jp/kegg-bin/show_pathway?mmu02010/mmu:18669%09blue	Environmental Information Processing
AMPK signaling pathway	mmu04152	0.372	0.774	Ppp2r5c|1.114164905;Crtc2|0.899121766	2	129	79	7883	http://www.kegg.jp/kegg-bin/show_pathway?mmu04152/mmu:26931%09red/mmu:74343%09blue	Environmental Information Processing
Cysteine and methionine metabolism	mmu00270	0.39	0.774	Enoph1|1.209000552	1	49	79	7883	http://www.kegg.jp/kegg-bin/show_pathway?mmu00270/mmu:67870%09red	Metabolism
Amino sugar and nucleotide sugar metabolism	mmu00520	0.39	0.774	Ugdh|0.855717931	1	49	79	7883	http://www.kegg.jp/kegg-bin/show_pathway?mmu00520/mmu:22235%09blue	Metabolism
Dopaminergic synapse	mmu04728	0.393	0.774	Prkacb|1.412545235;Ppp2r5c|1.114164905	2	135	79	7883	http://www.kegg.jp/kegg-bin/show_pathway?mmu04728/mmu:18749%09red/mmu:26931%09red	Organismal Systems
Drug metabolism - other enzymes	mmu00983	0.403	0.774	Tk1|1.114723764	1	51	79	7883	http://www.kegg.jp/kegg-bin/show_pathway?mmu00983/mmu:21877%09red	Metabolism
Ras signaling pathway	mmu04014	0.41	0.774	Prkacb|1.412545235;Rassf1|1.160994057;Rasal2|0.87026648	3	231	79	7883	http://www.kegg.jp/kegg-bin/show_pathway?mmu04014/mmu:18749%09red/mmu:56289%09red/mmu:226525%09blue	Environmental Information Processing
Staphylococcus aureus infection	mmu05150	0.415	0.774	Krt10|1.150806452	1	53	79	7883	http://www.kegg.jp/kegg-bin/show_pathway?mmu05150/mmu:16661%09red	Human Diseases
Insulin signaling pathway	mmu04910	0.418	0.774	Prkar2b|1.129358531;Prkacb|1.412545235	2	142	79	7883	http://www.kegg.jp/kegg-bin/show_pathway?mmu04910/mmu:19088%09red/mmu:18749%09red	Organismal Systems
Starch and sucrose metabolism	mmu00500	0.421	0.774	Ugdh|0.855717931	1	54	79	7883	http://www.kegg.jp/kegg-bin/show_pathway?mmu00500/mmu:22235%09blue	Metabolism
Endocrine and other factor-regulated calcium reabsorption	mmu04961	0.421	0.774	Prkacb|1.412545235	1	54	79	7883	http://www.kegg.jp/kegg-bin/show_pathway?mmu04961/mmu:18749%09red	Organismal Systems
Basal cell carcinoma	mmu05217	0.426	0.774	Sufu|1.100840336	1	55	79	7883	http://www.kegg.jp/kegg-bin/show_pathway?mmu05217/mmu:24069%09red	Human Diseases
Wnt signaling pathway	mmu04310	0.432	0.774	Cul1|1.101654846;Prkacb|1.412545235	2	146	79	7883	http://www.kegg.jp/kegg-bin/show_pathway?mmu04310/mmu:26965%09red/mmu:18749%09red	Environmental Information Processing
Valine, leucine and isoleucine degradation	mmu00280	0.432	0.774	Hmgcs1|0.88791883	1	56	79	7883	http://www.kegg.jp/kegg-bin/show_pathway?mmu00280/mmu:208715%09blue	Metabolism
Non-small cell lung cancer	mmu05223	0.432	0.774	Rassf1|1.160994057	1	56	79	7883	http://www.kegg.jp/kegg-bin/show_pathway?mmu05223/mmu:56289%09red	Human Diseases
Regulation of lipolysis in adipocytes	mmu04923	0.438	0.774	Prkacb|1.412545235	1	57	79	7883	http://www.kegg.jp/kegg-bin/show_pathway?mmu04923/mmu:18749%09red	-
Acute myeloid leukemia	mmu05221	0.438	0.774	Pml|1.109148431	1	57	79	7883	http://www.kegg.jp/kegg-bin/show_pathway?mmu05221/mmu:18854%09red	Human Diseases
Ovarian steroidogenesis	mmu04913	0.444	0.774	Prkacb|1.412545235	1	58	79	7883	http://www.kegg.jp/kegg-bin/show_pathway?mmu04913/mmu:18749%09red	Organismal Systems
Viral carcinogenesis	mmu05203	0.447	0.774	Hist1h4a|0.904739224;Mad1l1|1.112490098;Prkacb|1.412545235	3	245	79	7883	http://www.kegg.jp/kegg-bin/show_pathway?mmu05203/mmu:100041230%09blue/mmu:17120%09red/mmu:18749%09red	Human Diseases
NOD-like receptor signaling pathway	mmu04621	0.449	0.774	Ccl2|0.873331772	1	59	79	7883	http://www.kegg.jp/kegg-bin/show_pathway?mmu04621/mmu:20296%09blue	Organismal Systems
Glycerolipid metabolism	mmu00561	0.455	0.774	Dgat1|0.808318264	1	60	79	7883	http://www.kegg.jp/kegg-bin/show_pathway?mmu00561/mmu:13350%09blue	Metabolism
Synaptic vesicle cycle	mmu04721	0.466	0.774	Tcirg1|0.881232361	1	62	79	7883	http://www.kegg.jp/kegg-bin/show_pathway?mmu04721/mmu:27060%09blue	Organismal Systems
PI3K-Akt signaling pathway	mmu04151	0.468	0.774	Col1a1|0.870673527;Ppp2r5c|1.114164905;Crtc2|0.899121766;Col4a2|1.110524927	4	350	79	7883	http://www.kegg.jp/kegg-bin/show_pathway?mmu04151/mmu:12842%09blue/mmu:26931%09red/mmu:74343%09blue/mmu:12827%09red	Environmental Information Processing
Longevity regulating pathway - multiple species	mmu04213	0.477	0.774	Prkacb|1.412545235	1	64	79	7883	http://www.kegg.jp/kegg-bin/show_pathway?mmu04213/mmu:18749%09red	-
Metabolism of xenobiotics by cytochrome P450	mmu00980	0.482	0.774	Gstm1|1.108592514	1	65	79	7883	http://www.kegg.jp/kegg-bin/show_pathway?mmu00980/mmu:14862%09red	Metabolism
Long-term potentiation	mmu04720	0.487	0.774	Prkacb|1.412545235	1	66	79	7883	http://www.kegg.jp/kegg-bin/show_pathway?mmu04720/mmu:18749%09red	Organismal Systems
Central carbon metabolism in cancer	mmu05230	0.487	0.774	Slc7a5|0.876407129	1	66	79	7883	http://www.kegg.jp/kegg-bin/show_pathway?mmu05230/mmu:20539%09blue	Human Diseases
Drug metabolism - cytochrome P450	mmu00982	0.492	0.774	Gstm1|1.108592514	1	67	79	7883	http://www.kegg.jp/kegg-bin/show_pathway?mmu00982/mmu:14862%09red	Metabolism
Amphetamine addiction	mmu05031	0.497	0.774	Prkacb|1.412545235	1	68	79	7883	http://www.kegg.jp/kegg-bin/show_pathway?mmu05031/mmu:18749%09red	Human Diseases
p53 signaling pathway	mmu04115	0.497	0.774	Serpine1|0.895946907	1	68	79	7883	http://www.kegg.jp/kegg-bin/show_pathway?mmu04115/mmu:18787%09blue	Cellular Processes
Protein processing in endoplasmic reticulum	mmu04141	0.502	0.774	Cul1|1.101654846;Hspbp1|1.209334438	2	167	79	7883	http://www.kegg.jp/kegg-bin/show_pathway?mmu04141/mmu:26965%09red/mmu:66245%09red	Genetic Information Processing
Renin secretion	mmu04924	0.502	0.774	Prkacb|1.412545235	1	69	79	7883	http://www.kegg.jp/kegg-bin/show_pathway?mmu04924/mmu:18749%09red	-
Inositol phosphate metabolism	mmu00562	0.507	0.774	Impad1|0.853370396	1	70	79	7883	http://www.kegg.jp/kegg-bin/show_pathway?mmu00562/mmu:242291%09blue	Metabolism
Gastric acid secretion	mmu04971	0.522	0.774	Prkacb|1.412545235	1	73	79	7883	http://www.kegg.jp/kegg-bin/show_pathway?mmu04971/mmu:18749%09red	Organismal Systems
MicroRNAs in cancer	mmu05206	0.527	0.774	Abcb1b|0.883239171;Hmga2|1.200220022;Rassf1|1.160994057	3	276	79	7883	http://www.kegg.jp/kegg-bin/show_pathway?mmu05206/mmu:18669%09blue/mmu:15364%09red/mmu:56289%09red	Human Diseases
Arrhythmogenic right ventricular cardiomyopathy (ARVC)	mmu05412	0.527	0.774	Dag1|0.890359168	1	74	79	7883	http://www.kegg.jp/kegg-bin/show_pathway?mmu05412/mmu:13138%09blue	Human Diseases
Adherens junction	mmu04520	0.527	0.774	Yes1|0.881467545	1	74	79	7883	http://www.kegg.jp/kegg-bin/show_pathway?mmu04520/mmu:22612%09blue	Cellular Processes
Transcriptional misregulation in cancer	mmu05202	0.542	0.774	Pml|1.109148431;Hmga2|1.200220022	2	180	79	7883	http://www.kegg.jp/kegg-bin/show_pathway?mmu05202/mmu:18854%09red/mmu:15364%09red	Human Diseases
Calcium signaling pathway	mmu04020	0.548	0.774	Atp2b4|0.908158397;Prkacb|1.412545235	2	182	79	7883	http://www.kegg.jp/kegg-bin/show_pathway?mmu04020/mmu:381290%09blue/mmu:18749%09red	Environmental Information Processing
RNA degradation	mmu03018	0.568	0.774	Dcps|1.141900937	1	83	79	7883	http://www.kegg.jp/kegg-bin/show_pathway?mmu03018/mmu:69305%09red	Genetic Information Processing
Peroxisome	mmu04146	0.568	0.774	Idh1|0.899097816	1	83	79	7883	http://www.kegg.jp/kegg-bin/show_pathway?mmu04146/mmu:15926%09blue	Cellular Processes
Hypertrophic cardiomyopathy (HCM)	mmu05410	0.573	0.774	Dag1|0.890359168	1	84	79	7883	http://www.kegg.jp/kegg-bin/show_pathway?mmu05410/mmu:13138%09blue	Human Diseases
Small cell lung cancer	mmu05222	0.577	0.774	Col4a2|1.110524927	1	85	79	7883	http://www.kegg.jp/kegg-bin/show_pathway?mmu05222/mmu:12827%09red	Human Diseases
TGF-beta signaling pathway	mmu04350	0.577	0.774	Cul1|1.101654846	1	85	79	7883	http://www.kegg.jp/kegg-bin/show_pathway?mmu04350/mmu:26965%09red	Environmental Information Processing
PPAR signaling pathway	mmu03320	0.577	0.774	Plin2|0.903187441	1	85	79	7883	http://www.kegg.jp/kegg-bin/show_pathway?mmu03320/mmu:11520%09blue	Organismal Systems
Gap junction	mmu04540	0.581	0.774	Prkacb|1.412545235	1	86	79	7883	http://www.kegg.jp/kegg-bin/show_pathway?mmu04540/mmu:18749%09red	Cellular Processes
Aldosterone synthesis and secretion	mmu04925	0.581	0.774	Prkacb|1.412545235	1	86	79	7883	http://www.kegg.jp/kegg-bin/show_pathway?mmu04925/mmu:18749%09red	-
Insulin secretion	mmu04911	0.581	0.774	Prkacb|1.412545235	1	86	79	7883	http://www.kegg.jp/kegg-bin/show_pathway?mmu04911/mmu:18749%09red	Organismal Systems
GnRH signaling pathway	mmu04912	0.59	0.774	Prkacb|1.412545235	1	88	79	7883	http://www.kegg.jp/kegg-bin/show_pathway?mmu04912/mmu:18749%09red	Organismal Systems
Retinol metabolism	mmu00830	0.594	0.774	Dgat1|0.808318264	1	89	79	7883	http://www.kegg.jp/kegg-bin/show_pathway?mmu00830/mmu:13350%09blue	Metabolism
Taste transduction	mmu04742	0.594	0.774	Prkacb|1.412545235	1	89	79	7883	http://www.kegg.jp/kegg-bin/show_pathway?mmu04742/mmu:18749%09red	Organismal Systems
GABAergic synapse	mmu04727	0.594	0.774	Prkacb|1.412545235	1	89	79	7883	http://www.kegg.jp/kegg-bin/show_pathway?mmu04727/mmu:18749%09red	Organismal Systems
Chemokine signaling pathway	mmu04062	0.594	0.774	Prkacb|1.412545235;Ccl2|0.873331772	2	198	79	7883	http://www.kegg.jp/kegg-bin/show_pathway?mmu04062/mmu:18749%09red/mmu:20296%09blue	Organismal Systems
cAMP signaling pathway	mmu04024	0.594	0.774	Atp2b4|0.908158397;Prkacb|1.412545235	2	198	79	7883	http://www.kegg.jp/kegg-bin/show_pathway?mmu04024/mmu:381290%09blue/mmu:18749%09red	Environmental Information Processing
Fc gamma R-mediated phagocytosis	mmu04666	0.598	0.774	Asap2|1.166576381	1	90	79	7883	http://www.kegg.jp/kegg-bin/show_pathway?mmu04666/mmu:211914%09red	Organismal Systems
Focal adhesion	mmu04510	0.608	0.774	Col1a1|0.870673527;Col4a2|1.110524927	2	203	79	7883	http://www.kegg.jp/kegg-bin/show_pathway?mmu04510/mmu:12842%09blue/mmu:12827%09red	Cellular Processes
Morphine addiction	mmu05032	0.61	0.774	Prkacb|1.412545235	1	93	79	7883	http://www.kegg.jp/kegg-bin/show_pathway?mmu05032/mmu:18749%09red	Human Diseases
Chemical carcinogenesis	mmu05204	0.61	0.774	Gstm1|1.108592514	1	93	79	7883	http://www.kegg.jp/kegg-bin/show_pathway?mmu05204/mmu:14862%09red	Human Diseases
Proteoglycans in cancer	mmu05205	0.622	0.774	Col1a1|0.870673527;Prkacb|1.412545235	2	208	79	7883	http://www.kegg.jp/kegg-bin/show_pathway?mmu05205/mmu:12842%09blue/mmu:18749%09red	Human Diseases
Longevity regulating pathway	mmu04211	0.622	0.774	Prkacb|1.412545235	1	96	79	7883	http://www.kegg.jp/kegg-bin/show_pathway?mmu04211/mmu:18749%09red	-
Viral myocarditis	mmu05416	0.622	0.774	Dag1|0.890359168	1	96	79	7883	http://www.kegg.jp/kegg-bin/show_pathway?mmu05416/mmu:13138%09blue	Human Diseases
Phosphatidylinositol signaling system	mmu04070	0.626	0.774	Impad1|0.853370396	1	97	79	7883	http://www.kegg.jp/kegg-bin/show_pathway?mmu04070/mmu:242291%09blue	Environmental Information Processing
Estrogen signaling pathway	mmu04915	0.63	0.774	Prkacb|1.412545235	1	98	79	7883	http://www.kegg.jp/kegg-bin/show_pathway?mmu04915/mmu:18749%09red	Organismal Systems
Circadian entrainment	mmu04713	0.63	0.774	Prkacb|1.412545235	1	98	79	7883	http://www.kegg.jp/kegg-bin/show_pathway?mmu04713/mmu:18749%09red	Organismal Systems
Melanogenesis	mmu04916	0.633	0.774	Prkacb|1.412545235	1	99	79	7883	http://www.kegg.jp/kegg-bin/show_pathway?mmu04916/mmu:18749%09red	Organismal Systems
Retrograde endocannabinoid signaling	mmu04723	0.648	0.784	Prkacb|1.412545235	1	103	79	7883	http://www.kegg.jp/kegg-bin/show_pathway?mmu04723/mmu:18749%09red	Organismal Systems
Pyrimidine metabolism	mmu00240	0.652	0.784	Tk1|1.114723764	1	104	79	7883	http://www.kegg.jp/kegg-bin/show_pathway?mmu00240/mmu:21877%09red	Metabolism
HIF-1 signaling pathway	mmu04066	0.672	0.797	Serpine1|0.895946907	1	110	79	7883	http://www.kegg.jp/kegg-bin/show_pathway?mmu04066/mmu:18787%09blue	Environmental Information Processing
Insulin resistance	mmu04931	0.676	0.797	Crtc2|0.899121766	1	111	79	7883	http://www.kegg.jp/kegg-bin/show_pathway?mmu04931/mmu:74343%09blue	-
TNF signaling pathway	mmu04668	0.679	0.797	Ccl2|0.873331772	1	112	79	7883	http://www.kegg.jp/kegg-bin/show_pathway?mmu04668/mmu:20296%09blue	Environmental Information Processing
Cholinergic synapse	mmu04725	0.682	0.797	Prkacb|1.412545235	1	113	79	7883	http://www.kegg.jp/kegg-bin/show_pathway?mmu04725/mmu:18749%09red	Organismal Systems
Glutamatergic synapse	mmu04724	0.689	0.798	Prkacb|1.412545235	1	115	79	7883	http://www.kegg.jp/kegg-bin/show_pathway?mmu04724/mmu:18749%09red	Organismal Systems
Lysosome	mmu04142	0.716	0.819	Tcirg1|0.881232361	1	124	79	7883	http://www.kegg.jp/kegg-bin/show_pathway?mmu04142/mmu:27060%09blue	Cellular Processes
Sphingolipid signaling pathway	mmu04071	0.719	0.819	Ppp2r5c|1.114164905	1	125	79	7883	http://www.kegg.jp/kegg-bin/show_pathway?mmu04071/mmu:26931%09red	Environmental Information Processing
Inflammatory mediator regulation of TRP channels	mmu04750	0.722	0.819	Prkacb|1.412545235	1	126	79	7883	http://www.kegg.jp/kegg-bin/show_pathway?mmu04750/mmu:18749%09red	Organismal Systems
Vascular smooth muscle contraction	mmu04270	0.727	0.82	Prkacb|1.412545235	1	128	79	7883	http://www.kegg.jp/kegg-bin/show_pathway?mmu04270/mmu:18749%09red	Organismal Systems
Serotonergic synapse	mmu04726	0.741	0.829	Prkacb|1.412545235	1	133	79	7883	http://www.kegg.jp/kegg-bin/show_pathway?mmu04726/mmu:18749%09red	Organismal Systems
Spliceosome	mmu03040	0.746	0.829	Srsf5|1.133635636	1	135	79	7883	http://www.kegg.jp/kegg-bin/show_pathway?mmu03040/mmu:20384%09red	Genetic Information Processing
Apoptosis	mmu04210	0.756	0.834	Lmnb1|0.907486886	1	139	79	7883	http://www.kegg.jp/kegg-bin/show_pathway?mmu04210/mmu:16906%09blue	Cellular Processes
Tight junction	mmu04530	0.761	0.834	Yes1|0.881467545	1	141	79	7883	http://www.kegg.jp/kegg-bin/show_pathway?mmu04530/mmu:22612%09blue	Cellular Processes
Ribosome	mmu03010	0.778	0.847	Mrpl4|0.895971564	1	148	79	7883	http://www.kegg.jp/kegg-bin/show_pathway?mmu03010/mmu:66163%09blue	Genetic Information Processing
Oxytocin signaling pathway	mmu04921	0.8	0.864	Prkacb|1.412545235	1	158	79	7883	http://www.kegg.jp/kegg-bin/show_pathway?mmu04921/mmu:18749%09red	Organismal Systems
RNA transport	mmu03013	0.823	0.877	Sumo1|1.131894484	1	170	79	7883	http://www.kegg.jp/kegg-bin/show_pathway?mmu03013/mmu:22218%09red	Genetic Information Processing
cGMP-PKG signaling pathway	mmu04022	0.828	0.877	Atp2b4|0.908158397	1	173	79	7883	http://www.kegg.jp/kegg-bin/show_pathway?mmu04022/mmu:381290%09blue	Environmental Information Processing
Cell adhesion molecules (CAMs)	mmu04514	0.834	0.877	Pvr|0.887682869	1	176	79	7883	http://www.kegg.jp/kegg-bin/show_pathway?mmu04514/mmu:52118%09blue	Environmental Information Processing
Axon guidance	mmu04360	0.834	0.877	Cdk5|1.113606341	1	176	79	7883	http://www.kegg.jp/kegg-bin/show_pathway?mmu04360/mmu:12568%09red	Organismal Systems
Tuberculosis	mmu05152	0.839	0.877	Tcirg1|0.881232361	1	179	79	7883	http://www.kegg.jp/kegg-bin/show_pathway?mmu05152/mmu:27060%09blue	Human Diseases
Phagosome	mmu04145	0.859	0.892	Tcirg1|0.881232361	1	192	79	7883	http://www.kegg.jp/kegg-bin/show_pathway?mmu04145/mmu:27060%09blue	Cellular Processes
Regulation of actin cytoskeleton	mmu04810	0.892	0.921	Brk1|0.831082628	1	218	79	7883	http://www.kegg.jp/kegg-bin/show_pathway?mmu04810/mmu:101314%09blue	Cellular Processes
Epstein-Barr virus infection	mmu05169	0.907	0.93	Prkacb|1.412545235	1	232	79	7883	http://www.kegg.jp/kegg-bin/show_pathway?mmu05169/mmu:18749%09red	Human Diseases
MAPK signaling pathway	mmu04010	0.926	0.943	Prkacb|1.412545235	1	254	79	7883	http://www.kegg.jp/kegg-bin/show_pathway?mmu04010/mmu:18749%09red	Environmental Information Processing
Cytokine-cytokine receptor interaction	mmu04060	0.934	0.946	Ccl2|0.873331772	1	265	79	7883	http://www.kegg.jp/kegg-bin/show_pathway?mmu04060/mmu:20296%09blue	Environmental Information Processing
Neuroactive ligand-receptor interaction	mmu04080	0.946	0.952	Try5|0.879257693	1	285	79	7883	http://www.kegg.jp/kegg-bin/show_pathway?mmu04080/mmu:103964%09blue	Environmental Information Processing
Olfactory transduction	mmu04740	1	1	Prkacb|1.412545235	1	1102	79	7883	http://www.kegg.jp/kegg-bin/show_pathway?mmu04740/mmu:18749%09red	Organismal Systems
